# Supplementary material for: Growth and branching of gold nanoparticles through mesoporous silica thin films
Source: Royal Society of Chemistry journal article supplement (doi:10.1039/c2nr11547f), 2011-12-23
Supplement: c2nr11547f.pdf [file c2nr11547f.pdf]

## **Electronic Supplementary Information**

### **Growth and Branching of Gold nanoparticles Through Mesoporous Silica Thin Films**

Paula C. Angelomé,<sup>a\*</sup> Isabel Pastoriza-Santos,<sup>a</sup> Jorge Pérez-Juste,<sup>a</sup> Benito Rodríguez-  
González,<sup>a</sup> Andrés Zelcer,<sup>b</sup> Galo J. A. A. Soler-Illia,<sup>b</sup> and Luis M. Liz-Marzán<sup>a\*</sup>

<sup>a</sup> Departamento de Química Física and Unidad Asociada CSIC-Universidade de Vigo,  
36310, Vigo, Spain

<sup>b</sup> Gerencia de Química, Centro Atómico Constituyentes, Comisión Nacional de Energía  
Atómica, Av. Gral Paz 1499, B1650KNA, San Martín, Buenos Aires, Argentina

**Table S1.** Size of the particles (nuclei and tips) after different reaction times for S<sub>60</sub>@SF sample growth with a solution of CTAB, AA and Au with 60:16:1 molar ratio. The analysis was performed using several TEM images.

| <b>Reaction time/hs</b> | <b>Core size/nm</b> | <b>Tips width/nm</b> | <b>Tips length/nm</b> |
|-------------------------|---------------------|----------------------|-----------------------|
| 0                       | 59 ± 4              |                      |                       |
| 2                       | 59 ± 4              | 10 ± 2               | 11 ± 4                |
| 6                       | 59 ± 4              | 11 ± 2               | 13 ± 5                |

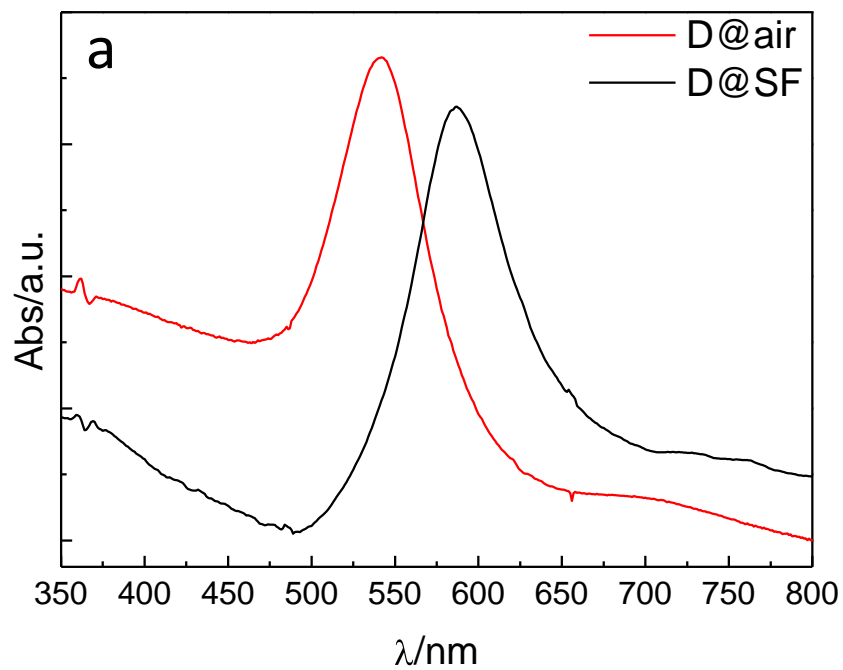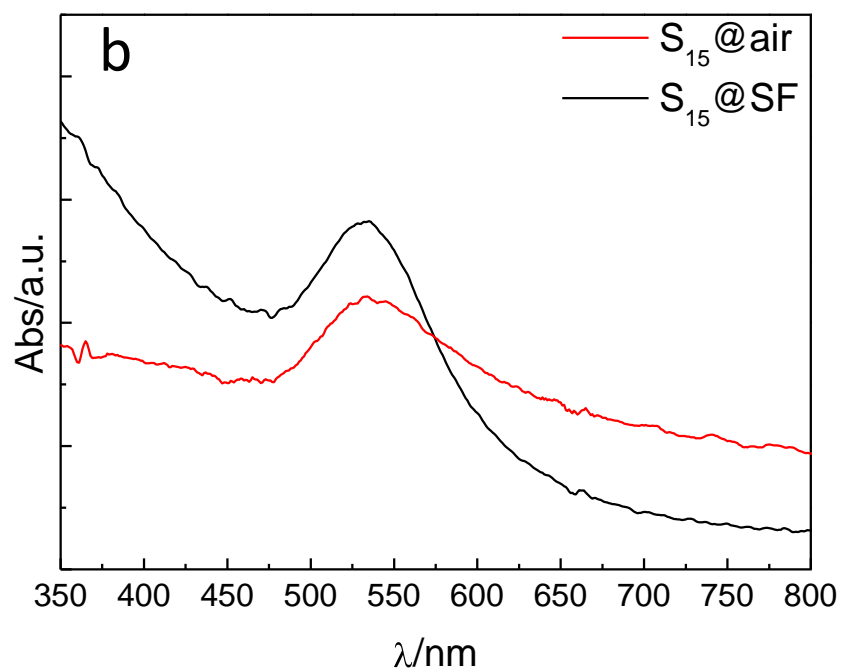

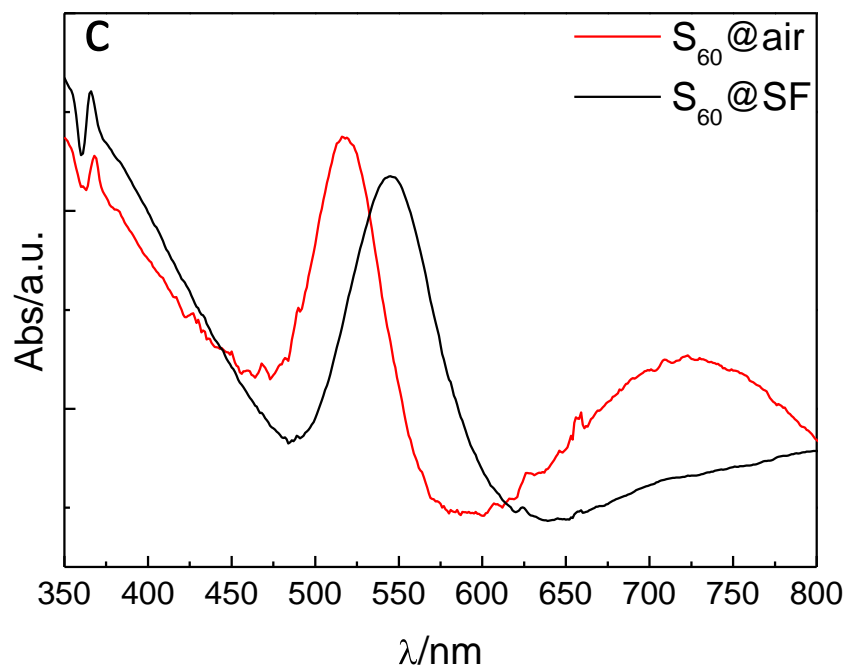

**Figure S1.** UV-visible spectra of Au decahedra (a), spheres of 15 nm diameter (b), and spheres of 60 nm diameter (c) deposited on top of a glass before and after coverage with mesoporous silica thin films.

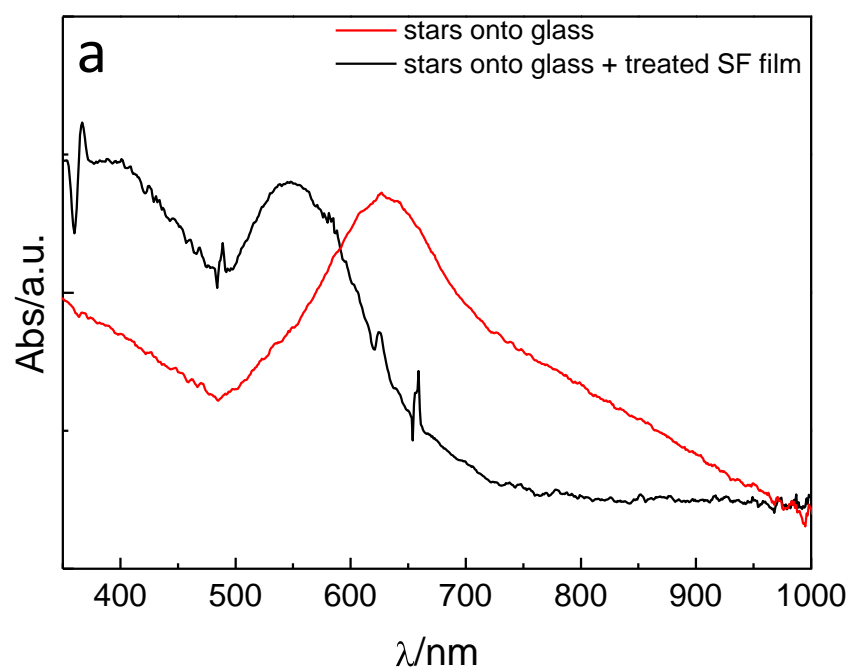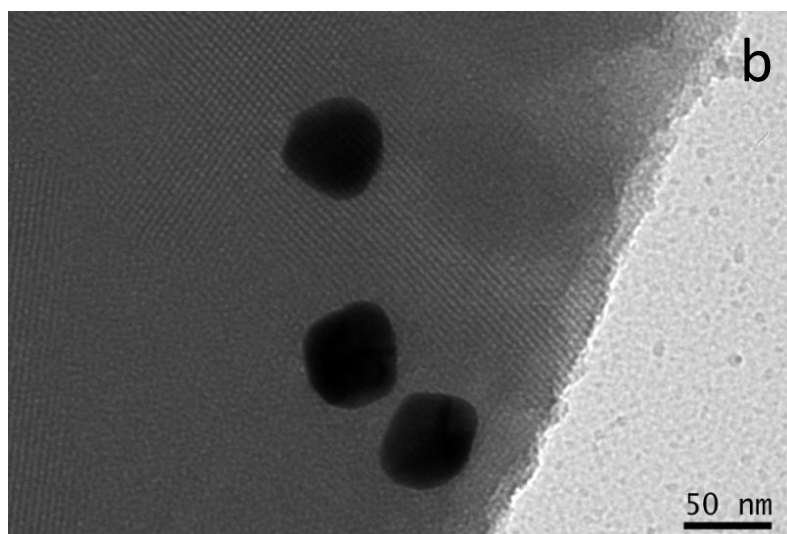

**Figure S2.** UV-visible-NIR spectra of St@SC sample before the film deposition and after thermal treatment of the film (a) and TEM picture after thermal treatment (b). Loss of tips is evident in TEM and reflected in the blue-shift of the UV-visible spectrum.

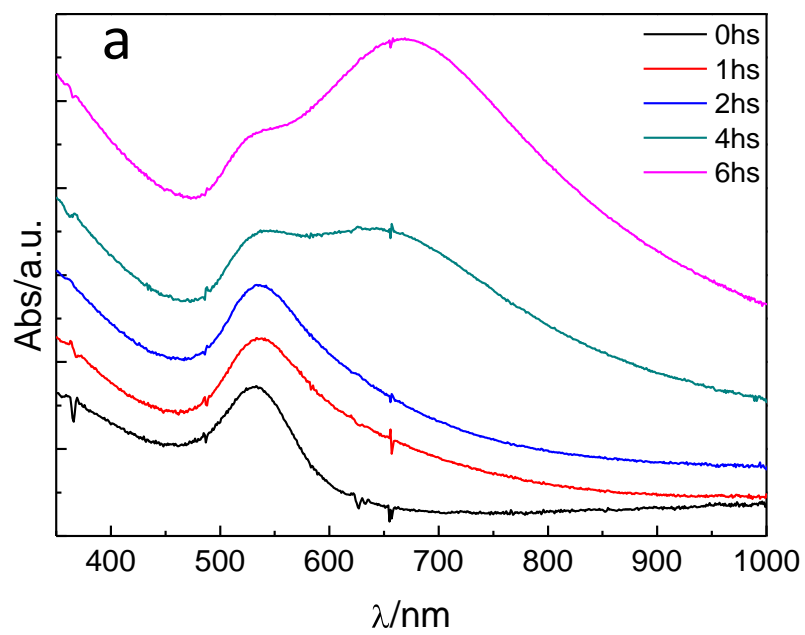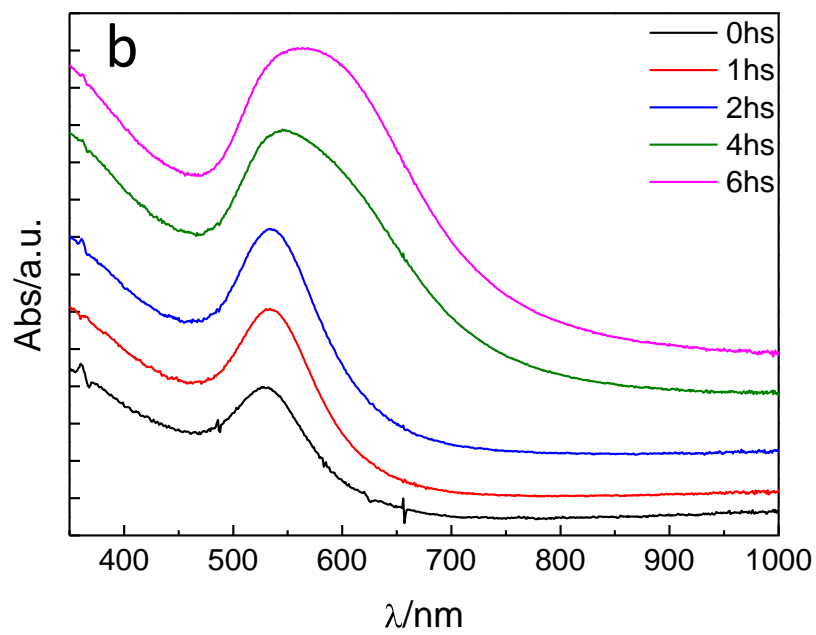

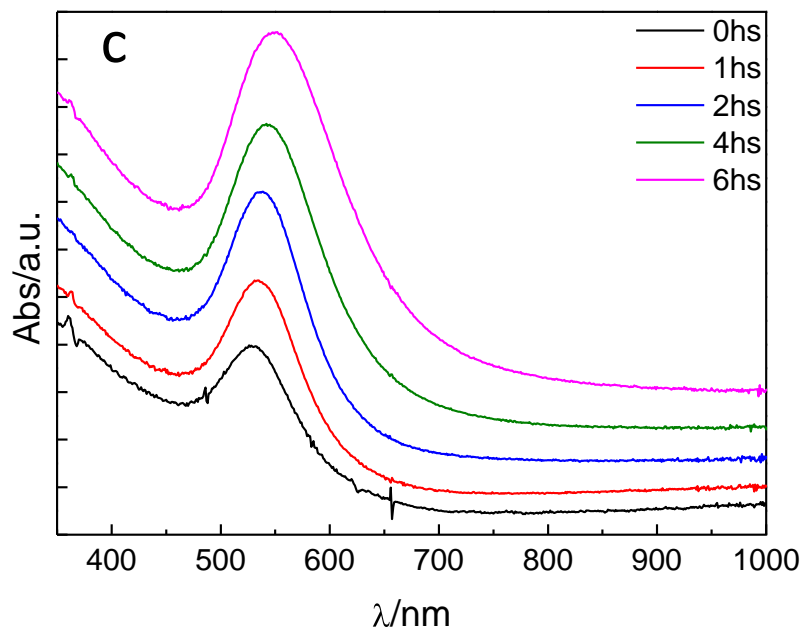

**Figure S3.** UV-visible-NIR spectra as a function of reaction time for different CTAB: Au molar ratios: 30 (**a**), 240 (**b**) and 800 (**c**). In all the cases, AA: Au = 16. The spectra were shifted vertically to improve visualization.

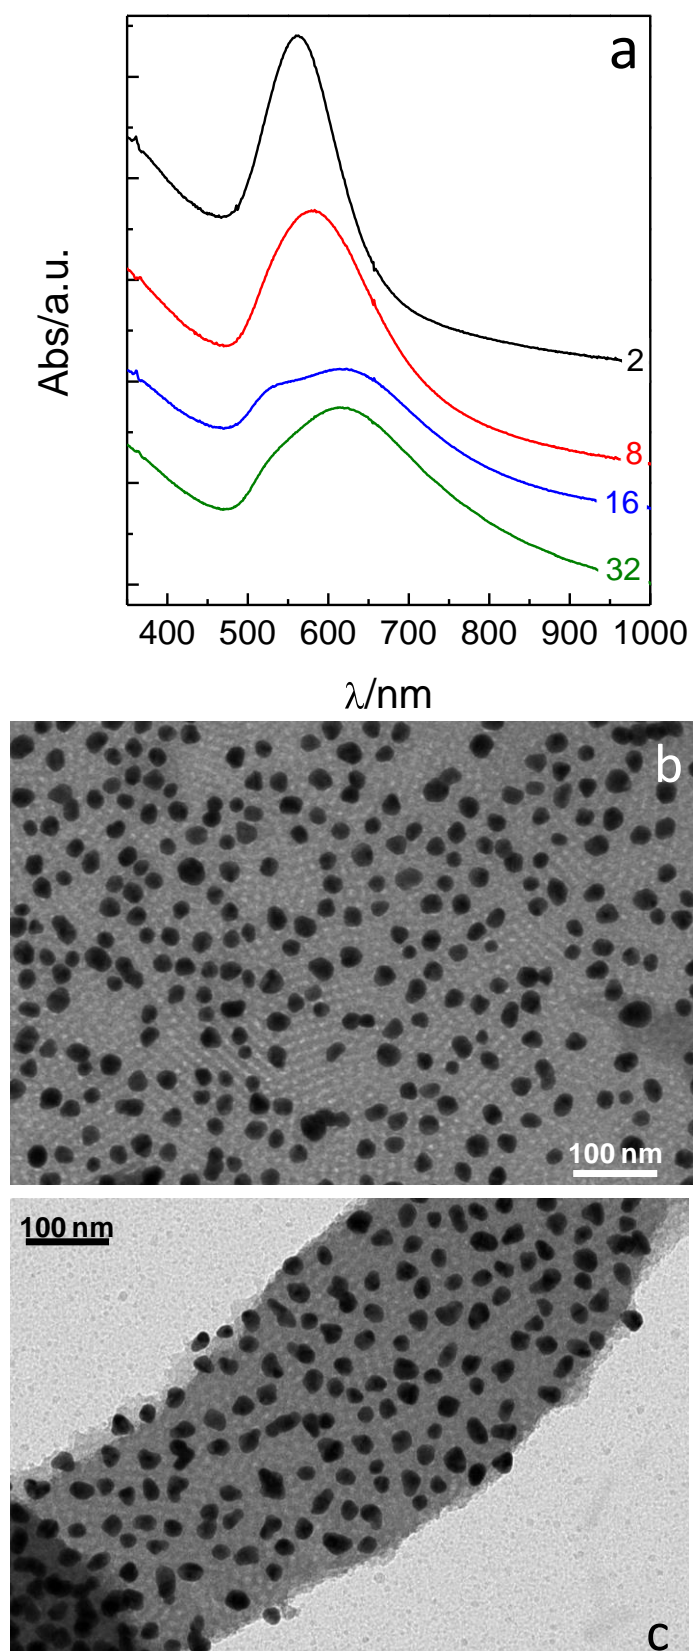

**Figure S4.** Effect of [AA] variation on the growth of  $S_{15}@SF$  with  $CTAB: Au = 60$ . (a) UV-visible-NIR spectra as a function of AA: Au molar ratio (as indicated in the labels) after 6h of reaction; the spectra were shifted to improve visualization. Representative TEM pictures for the lowest (b) and the highest (c) [AA].

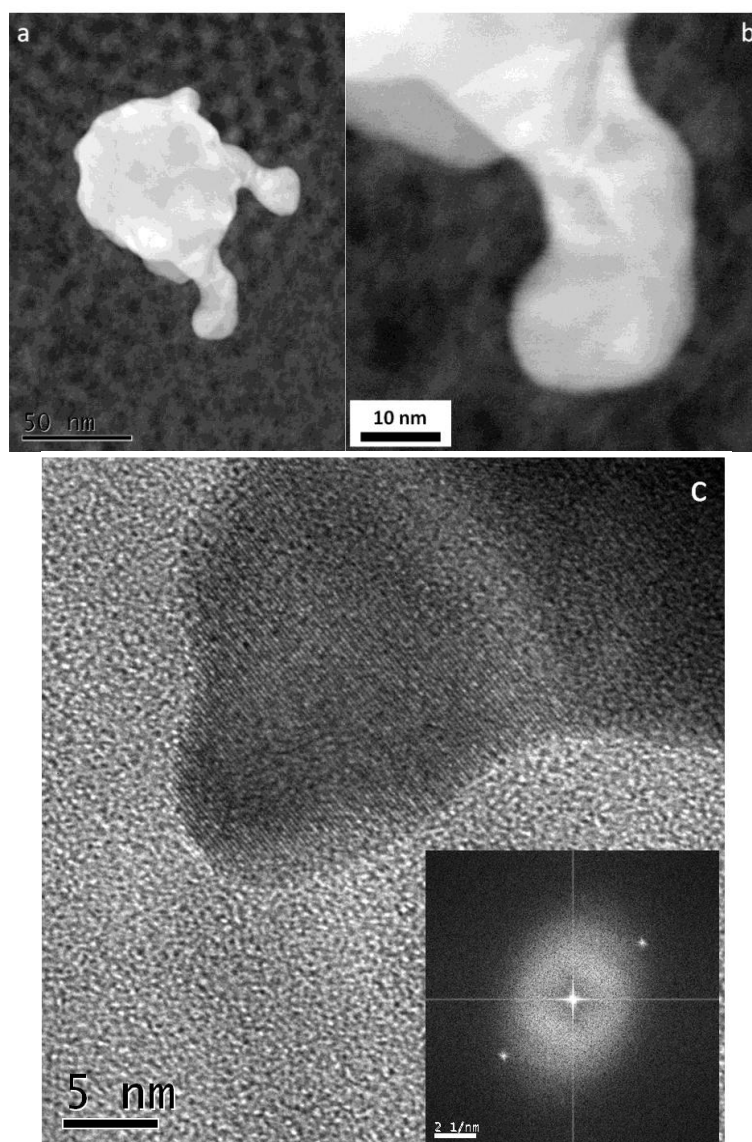

**Figure S5.** (a) STEM DF Image of a GNP from sample  $S_{60}@SF$  with particles attached by polyelectrolytes and after 6hs of reaction, (b) close up view of the polycrystalline 15 nm wide tip in (a). (c) HRTEM image of one single-crystal tip showing the Au lattice image. The Fourier transform in the inset confirms the single-crystalline nature of the tip and displays spots with a  $d_{hkl}$  of 2.32 Å assigned to (111) Au reflections.



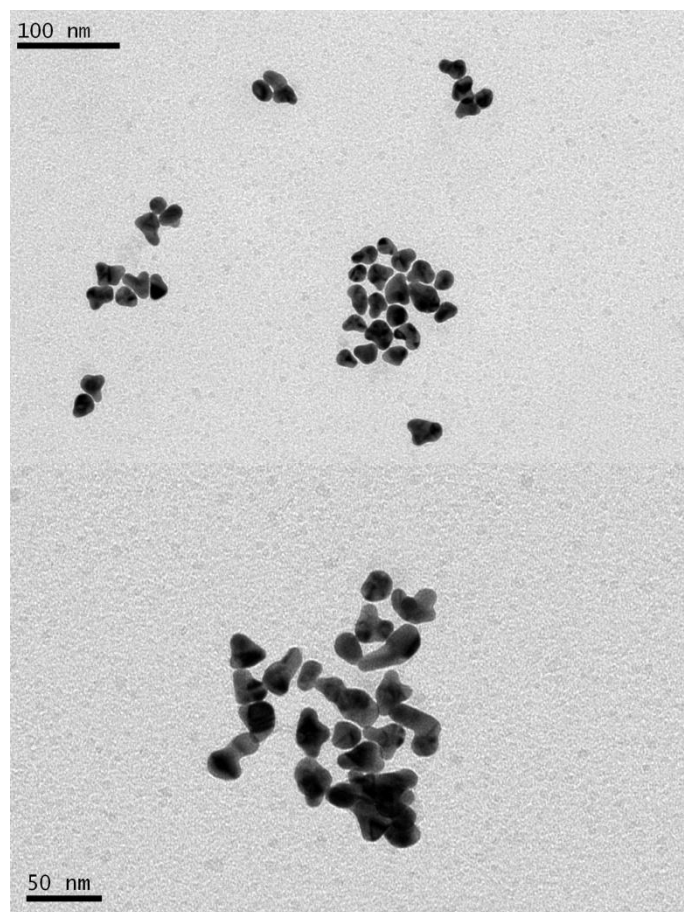

**Figure S6.** TEM image of particles obtained by dissolution of the SiO<sub>2</sub> matrix (with NaOH solution under sonication) of the sample S<sub>15</sub>@SF grown for 6h in an Au:CTAB:AA solution with molar ratio 1:60:16.
